# Supplementary material for: On the etiology of internalizing and externalizing problem behavior: A twin-family study
Source: PLOS journal article supplement (doi:10.1371/journal.pone.0230626), 2020-03-23
Supplement: S3 (10.1371/journal.pone.0230626.s003) [file journal.pone.0230626.s003]

**S3 Table.** Model parameters and variance components.

| Models                     | Model parameters |             |            |      |      |             |     |            | Standardized variance components |       |                                 |                  |        |        |       |
|----------------------------|------------------|-------------|------------|------|------|-------------|-----|------------|----------------------------------|-------|---------------------------------|------------------|--------|--------|-------|
|                            | a                | i           | $\mu$      | m    | f    | ct          | cs  | e          | $a^2$                            | $i^2$ | $a^2m(1 + \mu) + a^2f(1 + \mu)$ | $m^2+f^2+2mf\mu$ | $ct^2$ | $cs^2$ | $e^2$ |
| <b>Internalizing</b>       |                  |             |            |      |      |             |     |            |                                  |       |                                 |                  |        |        |       |
| cs = 0 (C11)               | <b>.50</b>       | -.10        | <b>.14</b> | .01  | -.02 | <b>.42</b>  |     | <b>.75</b> | .25                              | .01   | .00                             | .00              | .17    |        | .57   |
| cs = 0 (C17)               | <b>.63</b>       | .00         | <b>.15</b> | .01  | -.05 | .16         |     | <b>.77</b> | .39                              | .00   | -.02                            | .00              | .03    |        | .59   |
| cs = 0 (C23)               | <b>.58</b>       | -.21        | <b>.18</b> | -.01 | .01  | -.30*       |     | <b>.73</b> | .33                              | .05   | .00                             | .00              | .09    |        | .53   |
| i = 0 (C11)                | <b>-.51</b>      |             | <b>.14</b> | .01  | -.03 | <b>.42</b>  | .00 | <b>.75</b> | .26                              |       | -.01                            | .00              | .17    | .00    | .57   |
| i = 0 (C17)                | <b>-.62</b>      |             | <b>.15</b> | .01  | -.05 | .16         | .06 | <b>.77</b> | .39                              |       | -.01                            | .00              | .03    | .00    | .60   |
| i = 0 (C23)                | <b>-.63</b>      |             | <b>.18</b> | -.03 | -.01 | <b>.29</b>  | .00 | <b>.73</b> | .40                              |       | -.02                            | .00              | .09    | .00    | .54   |
| cs = 0, o. eq.             | <b>.58</b>       | -.11        | <b>.15</b> | .00  | -.03 | <b>-.32</b> |     | <b>.75</b> | .33                              | .01   | -.01                            | .00              | .10    |        | .56   |
| cs = m = f = i = 0, o. eq. | <b>-.56</b>      |             | <b>.15</b> |      |      | <b>.34</b>  |     | <b>.75</b> | .32                              |       |                                 |                  | .12    |        | .57   |
| <b>Externalizing</b>       |                  |             |            |      |      |             |     |            |                                  |       |                                 |                  |        |        |       |
| cs = 0 (C11)               | <b>.48</b>       | -.30*       | .05        | .00  | -.03 | -.17        |     | <b>.81</b> | .23                              | .09   | -.01                            | .00              | .03    |        | .66   |
| cs = 0 (C17)               | <b>.49</b>       | <b>-.38</b> | <b>.17</b> | -.01 | -.04 | .00         |     | <b>.79</b> | .24                              | .15   | -.01                            | .00              | .00    |        | .62   |
| cs = 0 (C23)               | <b>.48</b>       | <b>-.35</b> | <b>.17</b> | .01  | .01  | -.10        |     | <b>.80</b> | .23                              | .12   | .01                             | .00              | .01    |        | .63   |
| i = 0 (C11)                | <b>-.56</b>      |             | .05        | -.04 | -.07 | .15         | .00 | <b>.83</b> | .31                              |       | -.03                            | .01              | .02    | .00    | .69   |
| i = 0 (C17)                | <b>-.62</b>      |             | <b>.17</b> | -.06 | -.09 | .00         | .00 | <b>.81</b> | .38                              |       | -.07                            | .01              | .00    | .00    | .67   |
| i = 0 (C23)                | <b>-.60</b>      |             | <b>.17</b> | -.05 | -.04 | .00         | .00 | <b>.81</b> | .37                              |       | -.04                            | .00              | .00    | .00    | .66   |
| cs = 0, o. eq.             | <b>.50</b>       | <b>-.35</b> | <b>.12</b> | -.01 | -.03 | .00         |     | <b>.80</b> | .25                              | .12   | -.01                            | .00              | .00    |        | .64   |
| cs = m = f = ct = 0 (C11)  | <b>.46</b>       | <b>-.36</b> | .05        |      |      |             |     | <b>.81</b> | .21                              | .13   |                                 |                  |        |        | .66   |
| cs = m = f = ct = 0 (C17)  | <b>.45</b>       | <b>-.42</b> | <b>.17</b> |      |      |             |     | <b>.79</b> | .20                              | .18   |                                 |                  |        |        | .62   |
| cs = m = f = ct = 0 (C23)  | <b>.50</b>       | <b>-.34</b> | <b>.17</b> |      |      |             |     | <b>.80</b> | .25                              | .11   |                                 |                  |        |        | .63   |

C, birth cohort; o. eq: all other parameters were set equal across cohorts; a, additive genetic effects; i, non-additive genetic effects;  $\mu$ , phenotypic spousal similarity; m, environmental transmission from mother to offspring; f, environmental transmission from father to offspring; ct, twin-specific shared environmental effects; cs, sibling-specific shared environmental effects; e, non-shared environmental effects (including measurement error); **bold**,  $p < .001$ ; \*  $p < .01$
